# Supplementary material for: High-throughput virtual screening of organic second-order nonlinear optical chromophores within the donor–π-bridge–acceptor framework
Source: Royal Society of Chemistry journal article supplement (doi:10.1039/d3cp04046a), 2023-12-13
Supplement: d3cp04046a1.pdf [file d3cp04046a1.pdf]

**Electronic Supporting Information for  
“High-Throughput Virtual Screening of  
Second-Order Nonlinear Optical Chromophores  
within the Donor- $\pi$ -bridge-Acceptor Framework”**

Chunyun Tu,<sup>\*,†</sup> Weijiang Huang,<sup>†</sup> Sheng Liang,<sup>‡</sup> Kui Wang,<sup>†</sup> Qin Tian,<sup>†</sup> and  
Wei Yan<sup>\*,†</sup>

<sup>†</sup>*School of Chemistry and Materials Engineering, Guiyang University, Guiyang, 550005, P.  
R. of China.*

<sup>‡</sup>*School of Mathematics and Information Science, Guiyang University, Guiyang, 550005,  
P. R. of China.*

E-mail: yidapa@sina.cn; lrasyw@163.com

Phone: +86 182 7500 1640

## Generation of compound library

The compound library is constructed by combining donors,  $\pi$ -bridges and acceptors at preset connection sites (symbol \* is used to denote the connection site) within the donor- $\pi$ -acceptor frameworks. The structures of 30 donors, 21  $\pi$ -bridges and 43 acceptors are shown in Figure **S1**, **S2** and **S3**, respectively.

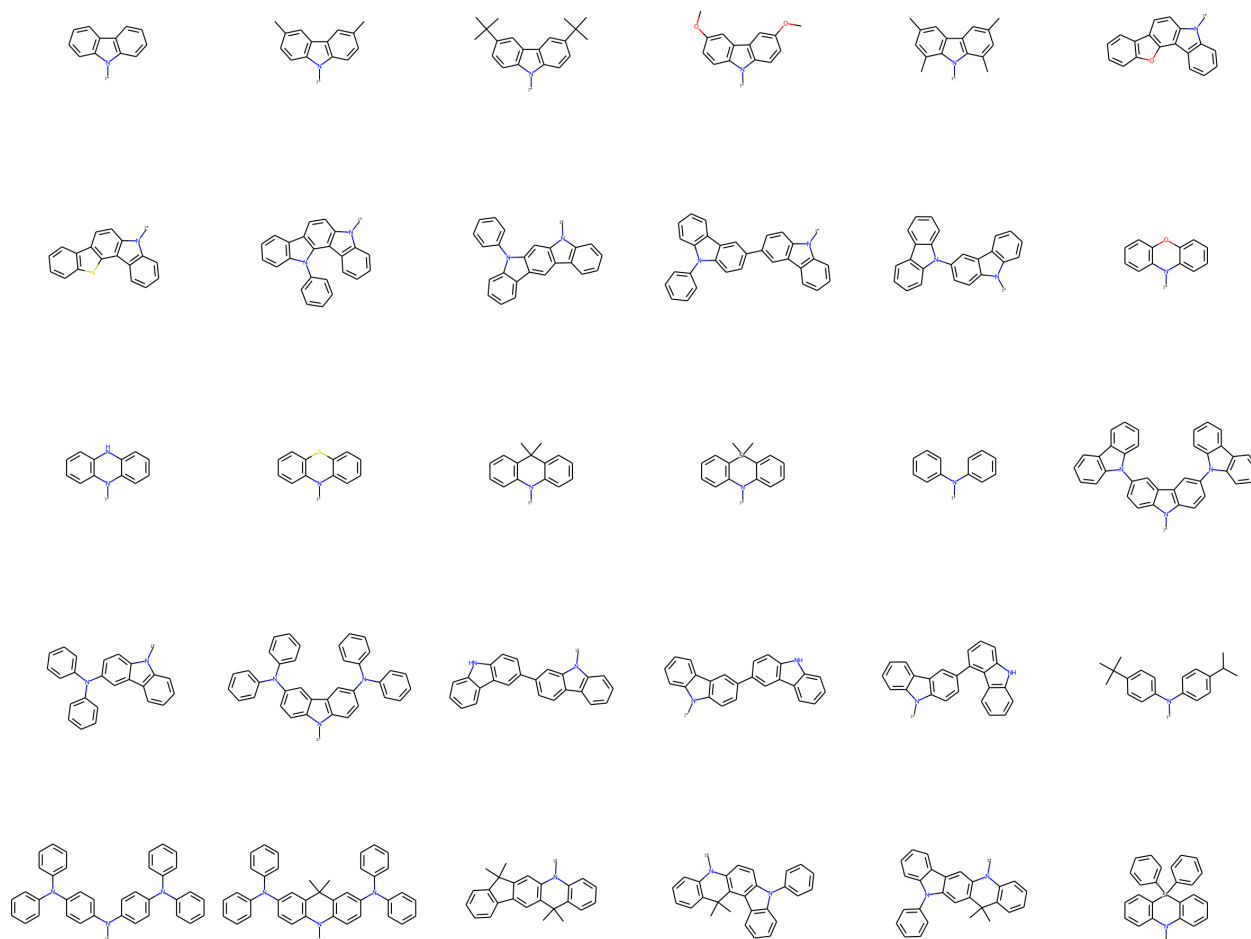

Figure S1: The donors (D) used as fragments for construction of donor- $\pi$ -acceptor (D- $\pi$ -A) molecules. (\* is used to denote the connection site)

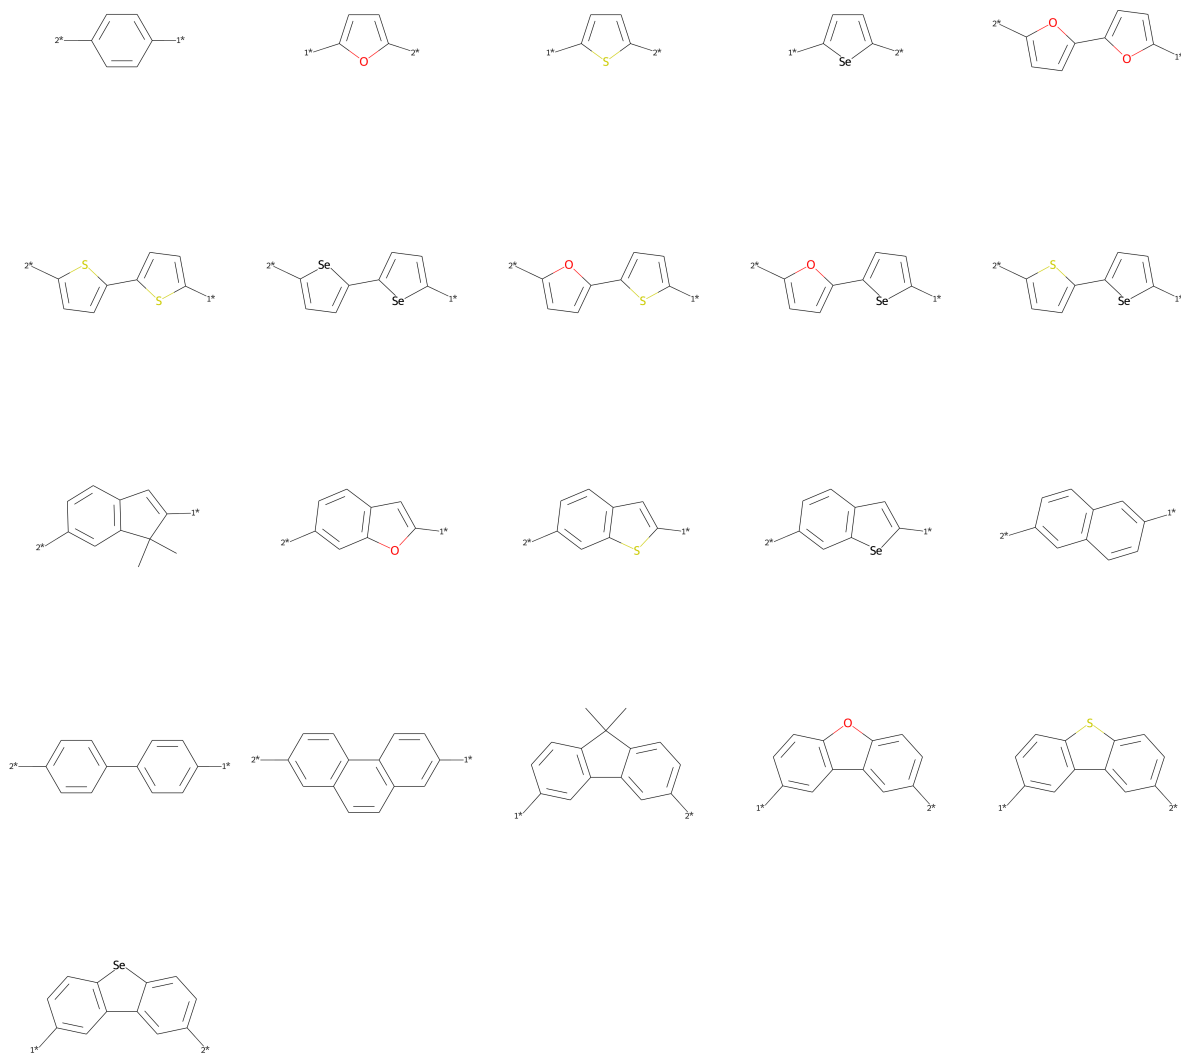

Figure S2: The  $\pi$ -bridges ( $\pi$ ) used as fragments for construction of donor- $\pi$ -acceptor (D- $\pi$ -A) molecules. (1\* and 2\* are used to denote the connection sites)

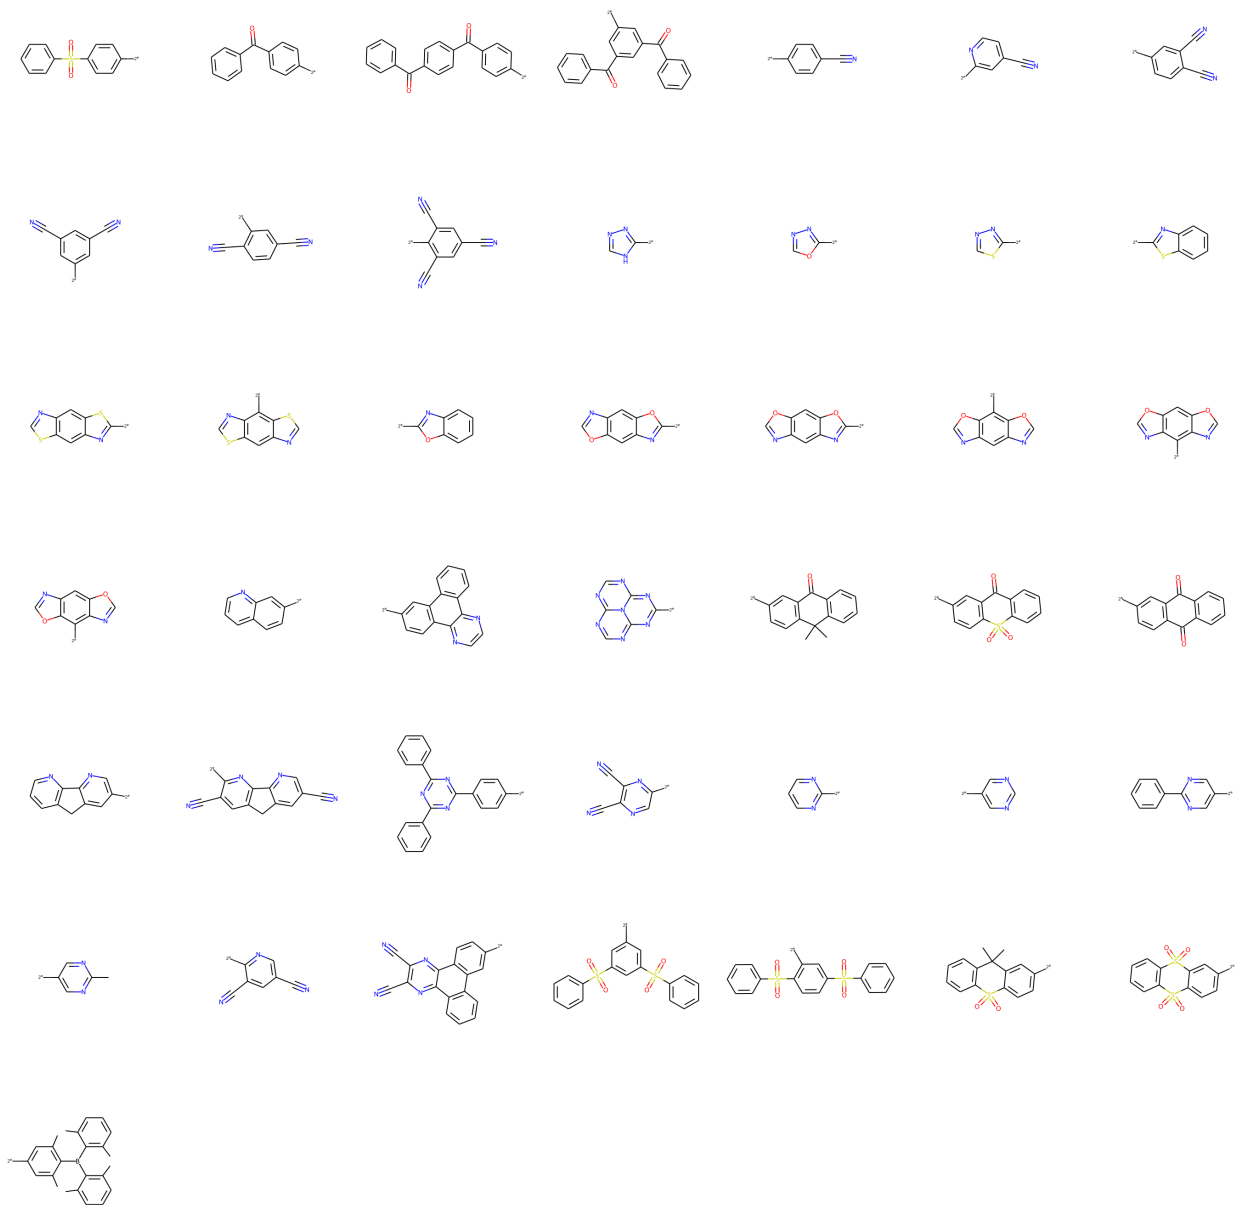

Figure S3: The acceptors (A) used as fragments for construction of donor-acceptor (DA) molecules. (\* is used to denote the connection site)

## Details for training and evaluation of machine learning model

The featurization of molecular structures for training molecules is carried out by utilizing the ECFP fingerprint (size = 2048) computing tool of the DeepChem package. By introducing the related tools of the open source machine learning Scikit-Learn package, a Random Forest Regressor (RandomForestRegressor, RF) from the ensemble module is adopted as the ML model, Grid Search Cross Validation (GridSearchCV) and relevant score function and method (cross\_val\_score and neg\_mean\_squared\_error) as tools for model selection, simple imputer (SimpleImputer) as data imputer, and a min max scaler (MinMaxScaler) for data scaling. The following grid parameters have been used for the Grid Search Cross Validation step: 'bootstrap': [ True, False ], 'n\_estimators': [ 3, 10, 30, 100 ], 'criterion': ["mse", "mae"], 'max\_depth': [ 2, 5, 10, 50 ], 'max\_features': ["auto", "sqrt", "log2"]

The ECFP fingerprints as the X featurization vector, and the computed energy gaps ( $\Delta E_{ST}$ ) as the Y object vector. The X;Y is fed to the RF model, by applying the GridSearchCV with above grid parameters, the cross\_val\_score method and 5-fold cross validation, the best ML model (best\_reg) is screened out from the grid search hyper-parameter space. The best\_reg is retrained with the training data, and is further evaluated by a 5-fold cross validation using the same scoring method (neg\_mean\_squared\_error). The newly learned ML model will be used for subsequent predicting property of unseen molecules in the original compound library.

The training of the multi-layer perceptron (MLP) regressor is very similar as above, with the following grid parameters for the Grid Search Cross Validation step: 'hidden\_layer\_sizes': [(50,), (100,), (250,), (500,), (50, 50), (100, 50), (100, 100), (250,50), (250,100), (250,250), (500, 50), (500, 100), (500, 250), (500, 500)], 'activation': ['identity', 'logistic', 'tanh', 'relu'], 'learning\_rate\_init': [0.01, 0.005, 0.001].

Obviously, the mean (about  $10^3$ ) and standard deviation of some of the models are small

enough (as compared with the large spanning range of the property,  $10^0 \sim 10^5$ ), hence the ML model could be safely used to predict the first hyperpolarizability of unseen molecules with considerable confidence.

# Distribution of Murcko decomposition skeletons

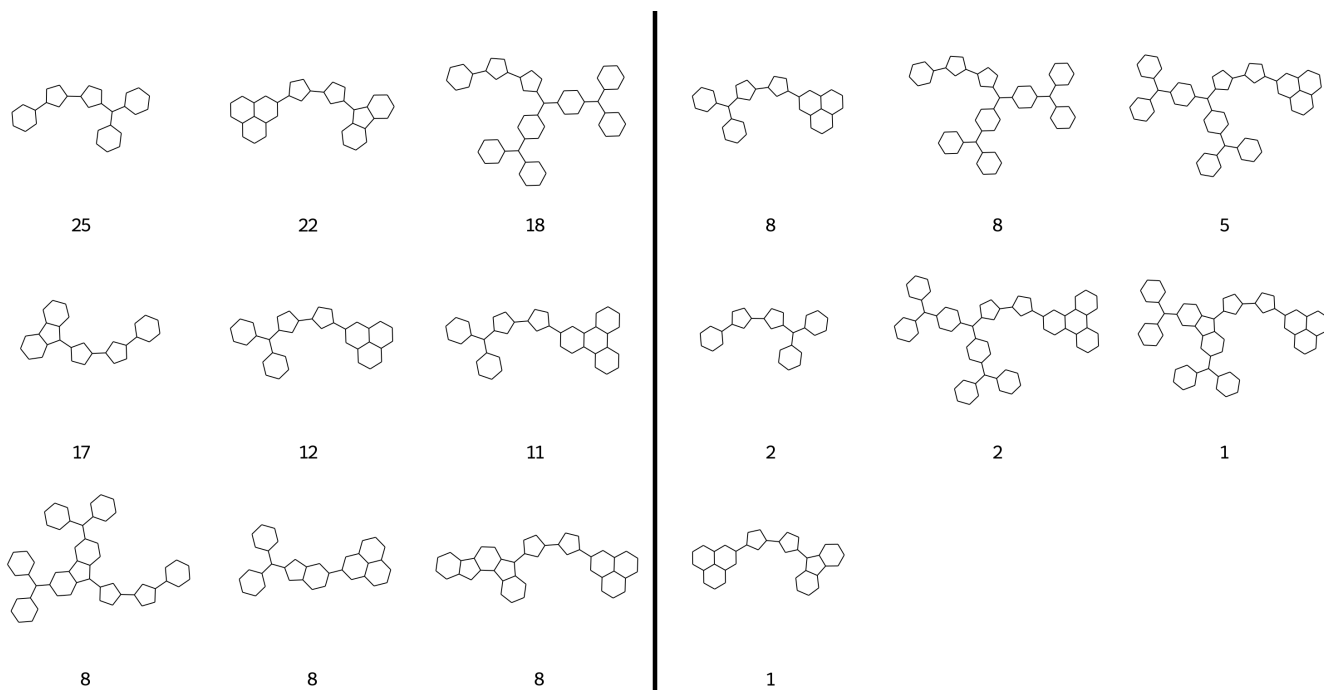

Figure S4: The structures and frequencies of occurrence for generic cores for top 1% (left side) and 1%0 (right side).

# Solvent effect on NLO response

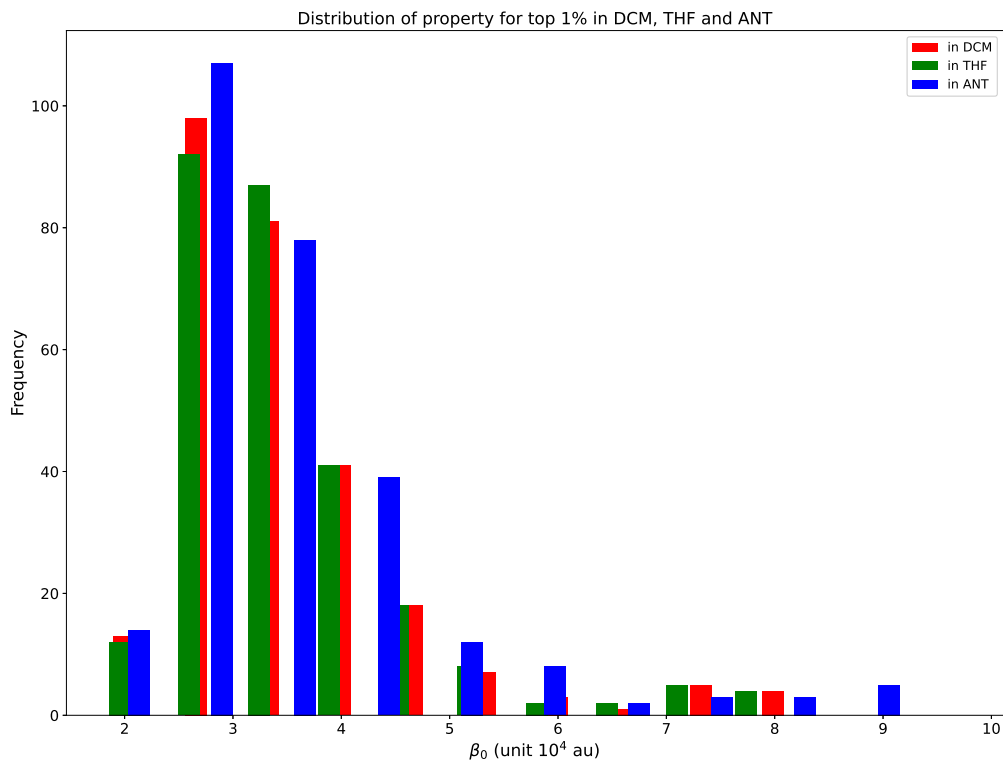

Figure S5: The distribution of calculated hyperpolarizability for top 1% molecules in solvents with different polarity. (DCM=dichloromethane, THF=tetrahydrofuran and ANT=acetonitrile)



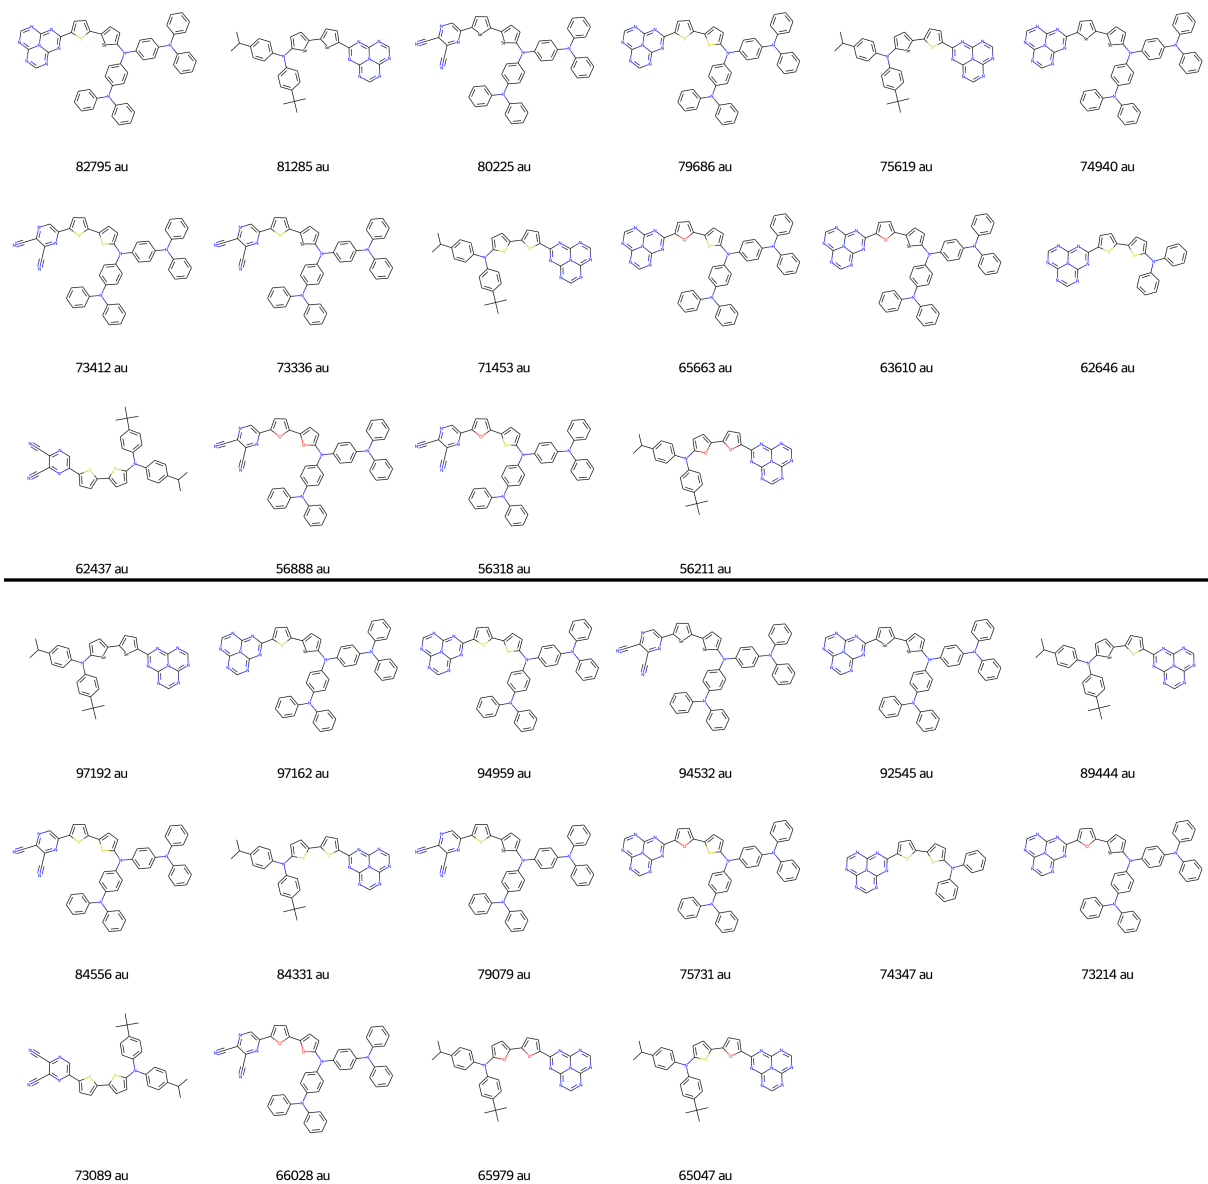

Figure S6: The structures of 16 optimal molecules with largest calculated static first hyperpolarizability in THF (on top) and ANT (at bottom). (THF=tetrahydrofuran and ANT=actonitrile)

## Molecules with additional $\pi$ spacers

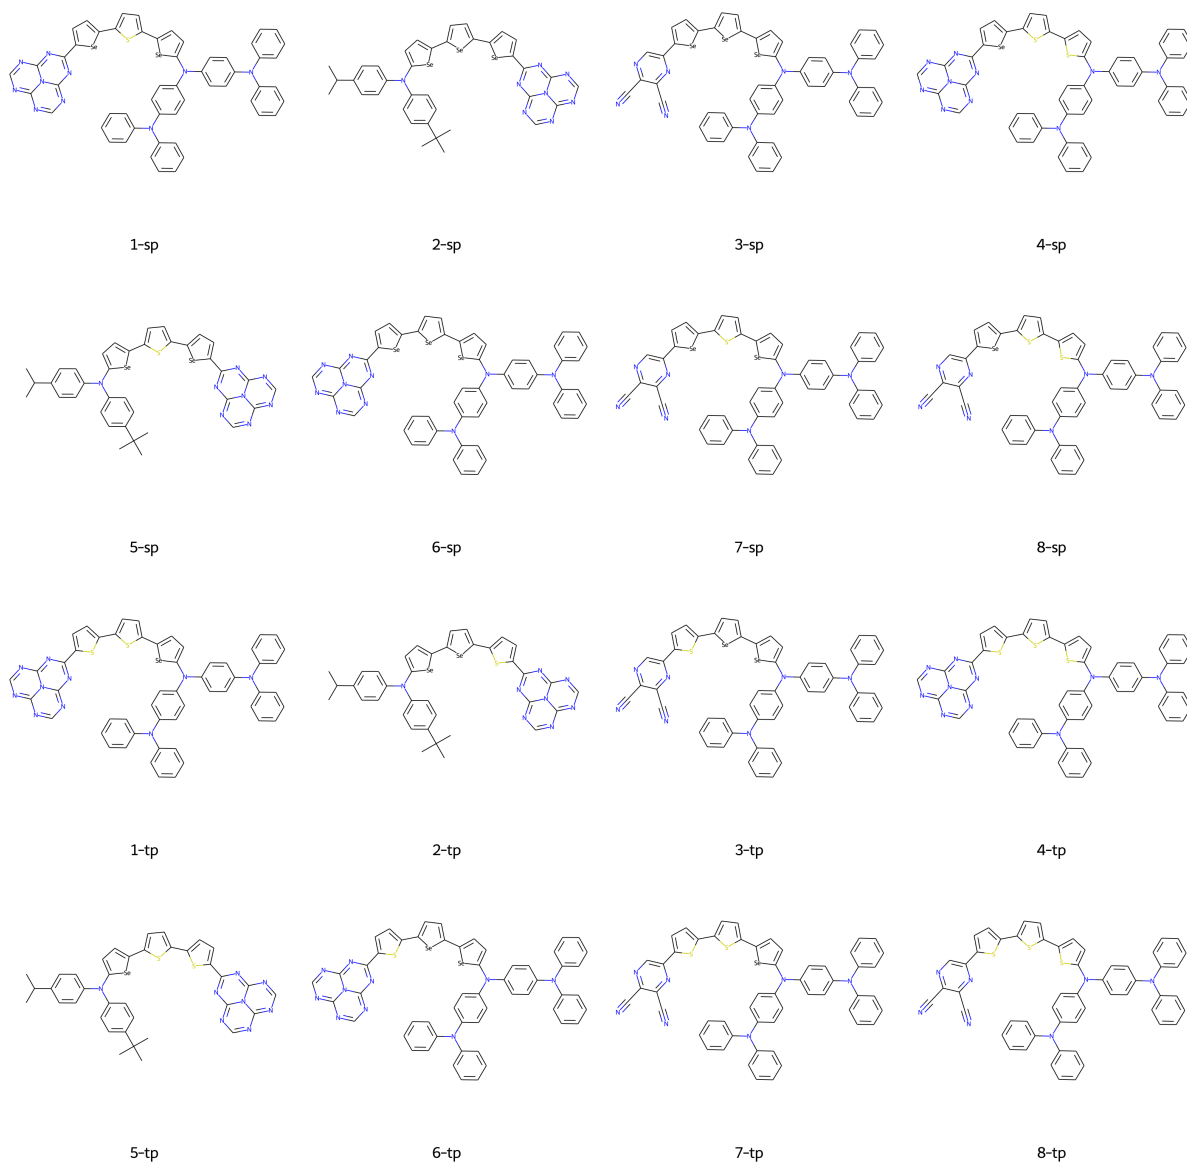

Figure S7: The structures of 8 top molecules with additional  $\pi$  spacers.

# Molecules with varied acceptors

**Table S1:** The first vertical excitation energy ( $E_{S1}$ ), oscillator strength ( $f$ ), dipole moment of ground-state ( $\mu_g$ ), dipole moment difference between  $S_0$  and  $S_1$  ( $\Delta\mu$ ), two-level theory estimated static first hyperpolarizability ( $\beta_0(est)$ ), computed hyperpolarizability ( $\beta_0$ ), and transferred charge ( $q_{CT}$ ) and distance ( $d_{CT}$ ) of charge-transfer between  $S_0$  and  $S_1$  of molecules with varied acceptors.

| compounds                                      | $E_{S1}$ (eV) | $E_{S1}$ (nm) | $f$   | $\mu_g$ (Debye) | $\Delta\mu$ (Debye) | $\beta_0(est)$ (au) | $\beta_0$ (au) | $q_{CT}$ (e) | $d_{CT}$ (Å) |
|------------------------------------------------|---------------|---------------|-------|-----------------|---------------------|---------------------|----------------|--------------|--------------|
| DEA-PHV-QXL-TCF                                | 2.16          | 575           | 2.497 | 31.96           | 24.94               | 4.90E+04            | 2.01E+05       | 0.832        | 6.31         |
| DEA-PHV-QXL-TCP                                | 1.79          | 693           | 2.222 | 27.25           | 30.23               | 9.29E+04            | 4.45E+05       | 0.889        | 7.11         |
| DPA-L2SeSe-TCF                                 | 1.89          | 657           | 2.151 | 32.03           | 11.48               | 2.90E+04            | 1.78E+05       | 0.667        | 3.90         |
| DPA-L2SeSe-TCP                                 | 1.57          | 788           | 2.248 | 33.56           | 8.07                | 3.72E+04            | 2.82E+05       | 0.581        | 3.12         |
| DPA-L2SeSe-TRZ                                 | 2.25          | 552           | 1.667 | 13.28           | 15.58               | 1.81E+04            | 0.92E+05       | 0.728        | 4.48         |
| DPA-L2SeSe-TRZ-CN                              | 2.11          | 586           | 1.759 | 19.32           | 16.31               | 2.42E+04            | 1.23E+05       | 0.730        | 4.64         |
| DPA-L2SeSe-TRZ-(CN) <sub>2</sub>               | 1.99          | 622           | 1.800 | 24.26           | 16.39               | 2.97E+04            | 1.53E+05       | 0.717        | 4.82         |
| DPA-L2SeSe-TRZ-NO <sub>2</sub>                 | 2.08          | 595           | 1.744 | 20.70           | 16.40               | 2.52E+04            | 1.28E+05       | 0.726        | 4.70         |
| DPA-L2SeSe-TRZ-(NO <sub>2</sub> ) <sub>2</sub> | 1.94          | 639           | 1.759 | 26.95           | 16.38               | 3.13E+04            | 1.62E+05       | 0.710        | 4.82         |
| DPA-L2SeS-TCF                                  | 1.92          | 644           | 2.098 | 31.12           | 11.82               | 2.78E+04            | 1.67E+05       | 0.679        | 4.04         |
| DPA-L2SeS-TCP                                  | 1.59          | 781           | 2.175 | 32.02           | 9.40                | 4.03E+04            | 2.98E+05       | 0.599        | 3.53         |
| DPA-L2SeS-TRZ                                  | 2.30          | 539           | 1.665 | 12.84           | 16.25               | 1.76E+04            | 0.86E+05       | 0.749        | 4.54         |
| DPA-L2SeS-TRZ-CN                               | 2.16          | 574           | 1.746 | 18.74           | 17.33               | 2.38E+04            | 1.16E+05       | 0.757        | 4.77         |
| DPA-L2SeS-TRZ-(CN) <sub>2</sub>                | 2.03          | 611           | 1.774 | 23.52           | 17.62               | 2.96E+04            | 1.48E+05       | 0.750        | 4.96         |
| DPA-L2SeS-TRZ-NO <sub>2</sub>                  | 2.13          | 583           | 1.726 | 20.09           | 17.51               | 2.48E+04            | 1.21E+05       | 0.752        | 4.85         |
| DPA-L2SeS-TRZ-(NO <sub>2</sub> ) <sub>2</sub>  | 1.97          | 629           | 1.725 | 26.12           | 17.72               | 3.17E+04            | 1.58E+05       | 0.744        | 4.96         |
| DPA-L2SSe-TCF                                  | 1.88          | 658           | 2.124 | 30.63           | 13.33               | 3.38E+04            | 1.91E+05       | 0.700        | 4.25         |
| DPA-L2SSe-TCP                                  | 1.56          | 794           | 2.234 | 32.08           | 10.34               | 4.83E+04            | 3.37E+05       | 0.617        | 3.65         |
| DPA-L2SSe-TRZ                                  | 2.23          | 555           | 1.616 | 12.39           | 17.36               | 2.01E+04            | 0.95E+05       | 0.763        | 4.75         |
| DPA-L2SSe-TRZ-CN                               | 2.10          | 591           | 1.710 | 18.75           | 17.88               | 2.62E+04            | 1.29E+05       | 0.766        | 4.92         |
| DPA-L2SSe-TRZ-(CN) <sub>2</sub>                | 1.97          | 629           | 1.751 | 23.46           | 18.35               | 3.33E+04            | 1.66E+05       | 0.762        | 4.98         |
| DPA-L2SSe-TRZ-NO <sub>2</sub>                  | 2.07          | 599           | 1.700 | 20.14           | 17.88               | 2.72E+04            | 1.35E+05       | 0.761        | 4.94         |
| DPA-L2SSe-TRZ-(NO <sub>2</sub> ) <sub>2</sub>  | 1.91          | 648           | 1.712 | 26.12           | 18.37               | 3.58E+04            | 1.78E+05       | 0.744        | 5.14         |
| DPA-L2SS-TCF                                   | 1.92          | 645           | 2.074 | 29.70           | 13.76               | 3.20E+04            | 1.77E+05       | 0.714        | 4.37         |
| DPA-L2SS-TCP                                   | 1.58          | 786           | 2.163 | 30.55           | 11.67               | 5.08E+04            | 3.47E+05       | 0.639        | 4.08         |
| DPA-L2SS-TRZ                                   | 2.29          | 542           | 1.609 | 11.90           | 18.05               | 1.92E+04            | 0.87E+05       | 0.782        | 4.79         |
| DPA-L2SS-TRZ-CN                                | 2.14          | 578           | 1.688 | 18.09           | 19.03               | 2.60E+04            | 1.21E+05       | 0.793        | 5.04         |
| DPA-L2SS-TRZ-(CN) <sub>2</sub>                 | 2.00          | 619           | 1.715 | 22.67           | 19.71               | 3.35E+04            | 1.59E+05       | 0.787        | 5.20         |
| DPA-L2SS-TRZ-NO <sub>2</sub>                   | 2.11          | 588           | 1.671 | 19.50           | 19.19               | 2.71E+04            | 1.28E+05       | 0.788        | 5.12         |
| DPA-L2SS-TRZ-(NO <sub>2</sub> ) <sub>2</sub>   | 1.94          | 639           | 1.668 | 25.29           | 19.85               | 3.60E+04            | 1.73E+05       | 0.777        | 5.32         |
| DPA-L3SeSeSe-TRZ-(CN) <sub>2</sub>             | 1.81          | 685           | 2.080 | 23.52           | 23.57               | 6.56E+04            | 3.17E+05       | 0.828        | 5.87         |
| DPA-L3SeSeS-TRZ-(CN) <sub>2</sub>              | 1.85          | 670           | 2.031 | 22.57           | 24.67               | 6.28E+04            | 2.90E+05       | 0.848        | 6.03         |
| DPA-L3SeSSe-TRZ-(CN) <sub>2</sub>              | 1.85          | 671           | 2.039 | 22.85           | 24.46               | 6.25E+04            | 2.92E+05       | 0.843        | 6.06         |
| DPA-L3SeSS-TRZ-(CN) <sub>2</sub>               | 1.89          | 657           | 1.989 | 21.97           | 25.60               | 5.98E+04            | 2.68E+05       | 0.862        | 6.16         |
| DPA-L3SSeSe-TRZ-(CN) <sub>2</sub>              | 1.82          | 682           | 2.016 | 22.80           | 24.97               | 6.62E+04            | 3.11E+05       | 0.845        | 6.20         |
| DPA-L3SSeS-TRZ-(CN) <sub>2</sub>               | 1.86          | 667           | 1.962 | 21.94           | 26.03               | 6.30E+04            | 2.83E+05       | 0.863        | 6.31         |
| DPA-L3SSS-TRZ-(CN) <sub>2</sub>                | 1.86          | 667           | 1.964 | 21.88           | 26.07               | 6.31E+04            | 2.82E+05       | 0.865        | 6.29         |
| DPA-L3SSS-TRZ-(CN) <sub>2</sub>                | 1.90          | 654           | 1.913 | 21.23           | 27.13               | 6.00E+04            | 2.59E+05       | 0.883        | 6.40         |

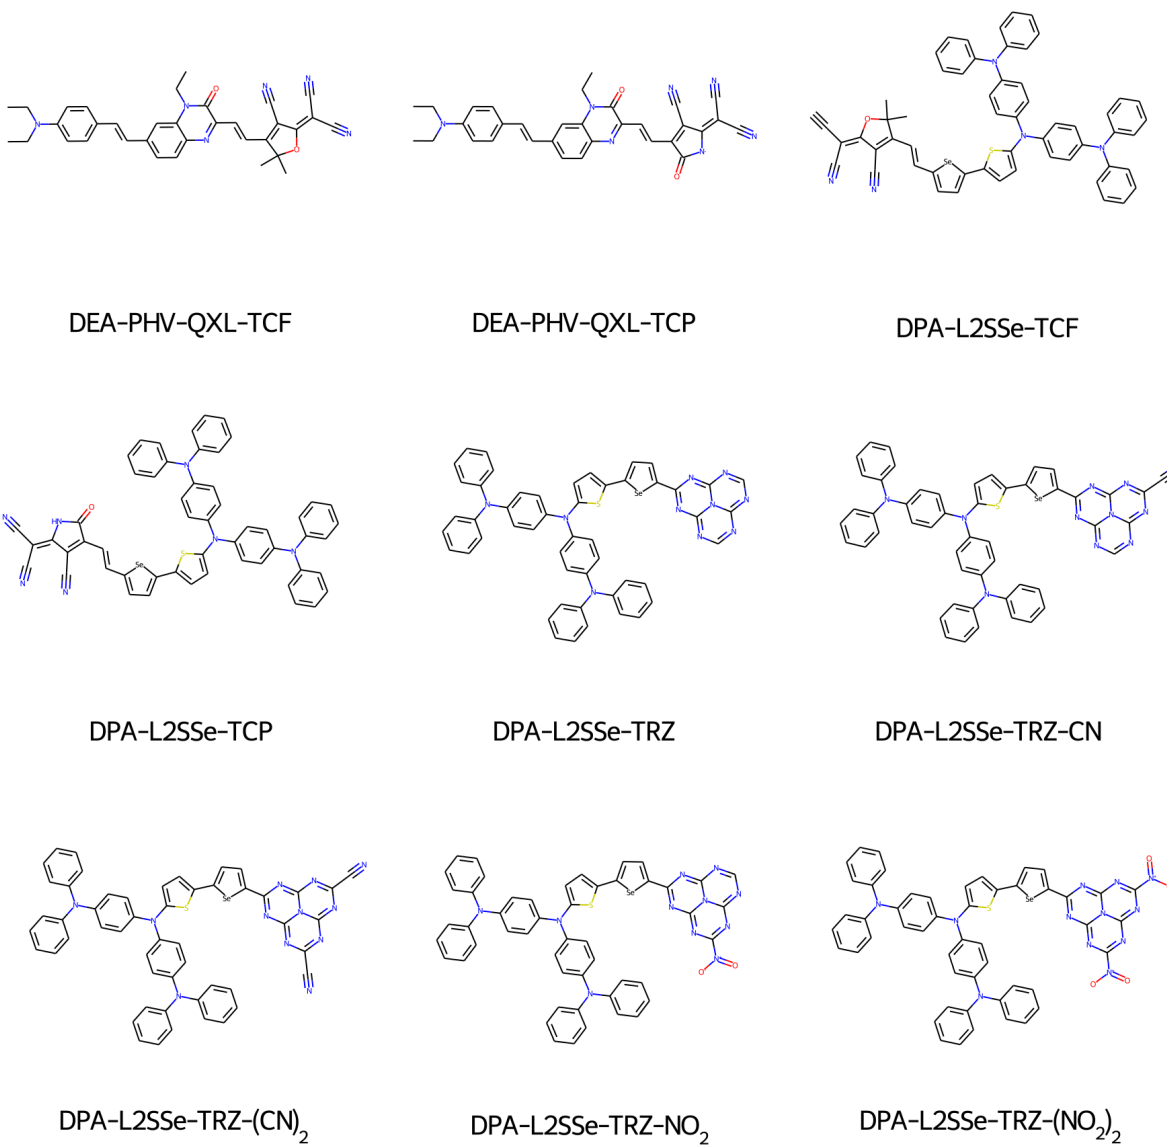

Figure S8: The structures and shorthand names of representative molecules with varied acceptors.
